# Supplementary material for: Simultaneous brain, brainstem, and spinal cord pharmacological-fMRI reveals involvement of an endogenous opioid network in attentional analgesia
Source: eLife. 2022 Jan 26;11:e71877. doi: 10.7554/eLife.71877 (PMC8843089; doi:10.7554/eLife.71877)
Supplement: Figure 2—figure supplement 2—source data 1. [file elife-71877-fig2-figsupp2-data1.csv]

Placebo		Reboxetine		Naltrexone
HH-EH VAS		HH-EH VAS		HH-EH VAS
-10.8		-4.6		2.3
-2		-9		13.7
-5.4		13.2		6.3
2.6		-4.3		13.2
0.6		-12.7		-7
3.7		-1.7		-1.2
2.8		-2.5		5.4
-10.3		-16.7		-28.8
-6.7		-6.5		2.7
-8		1		-11.7
2.4		10.7		-1
-3.2		-28		15.3
-1.7		-2		-1.8
-16.8		-10		-0.3
-3.6		-4.2		2.8
1.3		18.5		3.5
-1.5		-7.8		-3
1.3		0		-3.7
6		-7.5		-2.7
1.5		-2		-5
-7.2		-16.5		-18.8
-6		0.2		-8
-3.8		-5		-7.5
3		0.7		-4.5
-12		-16.7		8.5
-2		6.8		3.5
-2		-11.5		4
-4.5		-4.2		-7.8
1.7		5.7		4.7
-5		3.5		5.7
3.6		2.2		5
-14.4		-15.2		-6.7
0		-4.6		-4.2
2		-4.7		-4.6
-7.3		-6.8		-0.8
0.5		0.3		-5.7
-10		-8.5		4.3
-3.5		-0.2		-4.3
-0.2		5.7		3.7
