# Supplementary material for: Simultaneous brain, brainstem, and spinal cord pharmacological-fMRI reveals involvement of an endogenous opioid network in attentional analgesia
Source: eLife. 2022 Jan 26;11:e71877. doi: 10.7554/eLife.71877 (PMC8843089; doi:10.7554/eLife.71877)
Supplement: Figure 2—figure supplement 2—source data 2. [file elife-71877-fig2-figsupp2-data2.csv]

BOLD parameter estimates extracted from spinal_noci cluster sowing contrast between High Hard - Easy High condition across the drug sessions
Placebo		Reboxetine		Naltrexone
HH-EH PE		HH-EH PE		HH-EH PE
0.242		-5.779		-0.8327
-4.703		-0.47		9.39
0.713		-1.9898		0.2538
2.182		2.846		-2.694
-0.1251		0.7563		5.9594
-1.379		-2.74		0.84026
1.698		-2.4103		1.4475
0.1698		6.37		-9.2793
-1.945		-1.45		-15.05
0.0241		2.846		-2.87
-4.92		-0.481		0.183
1.585		4.023		1.4032
-2.2101		-37.753		2.842
1.357		-0.025		1.051
-6.599		3.525		1.546
0.6319		-0.987		-1.083
-0.9529		2.058		-0.8877
-6.706		1.224		0.331
-0.0952		3.341		-6.3631
-0.3227		2.727		-4.0324
1.7931		-2.811		1.111
-4.9431		-17.6		4.6687
0.5766		-3.6146		0.088
7.58		4.361		0.517
4.528		0.702		-0.1834
-0.48		-2.164		-9.57
-6.35		0.499		4.983
-4.085		-2.194		0.831
0.6951		-0.36885		1.441
5.676		0.778		-0.9705
3.277		-38.53		-2.354
-1.5501		0.158574		3.257
-7.5478		1.039		-2.868
-0.8881		-0.047		8.784
-8.293		-2.5		-3.011
5.544		-0.16		-1.4071
-1.152		4.54		11.16
-2.604		2.475		0.765
2.5672		0.5999		-2.4056
