# Supplementary material for: Simultaneous brain, brainstem, and spinal cord pharmacological-fMRI reveals involvement of an endogenous opioid network in attentional analgesia
Source: eLife. 2022 Jan 26;11:e71877. doi: 10.7554/eLife.71877 (PMC8843089; doi:10.7554/eLife.71877)
Supplement: Figure 2—figure supplement 2—source data 3. [file elife-71877-fig2-figsupp2-data3.csv]

BOLD parameter estimates extracted from spinal_int cluster showing in High Hard condition across the drug sessions
Placebo		Reboxetine		Naltrexone
HH PE		HH PE		HH PE
-2.655		1.487		2.271
5.271		1.661		-3.223
1.025		0.7428		0.9326
3.759		3.268		-4.253
3.504		6.332		5.702
4.589		3.941		0.7922
4.359		0.785		0.3658
-0.3462		8.118		12.95
-0.6643		1.253		-41.44
1.09		1.251		3.709
3.958		2.009		1.605
3.819		7.201		0.369
0.9237		9.351		4.11
12.32		0.1694		2.487
5.125		1.04		-4.544
-0.4304		0.5933		1.086
1.88		0.6729		1.055
3.968		4.059		1.434
1.639		4.186		6.005
1.584		-1.502		0.8077
0.5782		1.208		2.751
-3.222		-1.37		5.466
-2.6		-3.92		1.611
10.93		2.234		1.98
2.878		0.1414		3.241
-0.732		4.94		9.604
9.383		0.2881		8.948
-20.22		8.956		12.89
2.756		0.6128		-6.925
2		1.414		2.786
0.3015		-1.563		12.24
-3.187		1.15		4.293
0.8536		4.629		-4.764
0.1684		4.146		-1.501
6.502		0.6373		1.933
11.75		6.292		0.1432
29.3		4.115		8.715
4.333		35.52		8.726
-1.54		1.063		-1.304
