# Supplementary material for: Simultaneous brain, brainstem, and spinal cord pharmacological-fMRI reveals involvement of an endogenous opioid network in attentional analgesia
Source: eLife. 2022 Jan 26;11:e71877. doi: 10.7554/eLife.71877 (PMC8843089; doi:10.7554/eLife.71877)
Supplement: Figure 2—figure supplement 3—source data 1. [file elife-71877-fig2-figsupp3-data1.csv]

Placebo	Placebo	Reboxetine		Placebo	Placebo	Reboxetine
HH (ûC)	HH (ûC)	HH (ûC)		RSVP (ms)	RSVP (ms)	RSVP (ms)
45	45	45		32	32	48
44	44	44		48	32	64
45	45	45		48	64	32
45	45	44		80	48	32
45	45	45		64	80	48
41	41	41		64	32	64
44	44	43		96	32	80
41	42	41		32	32	32
45	45	45		80	64	80
42	42	42		64	80	64
42	41	42		32	80	64
44	44	44		32	48	64
45	45	45		64	48	48
43	43	43		32	32	32
45	45	45		32	48	48
43	43	43		64	64	64
43	44	43		48	48	80
41	41	41		32	64	48
45	45	45		64	32	64
45	45	45		64	48	48
45	45	45		96	96	96
45	45	45		80	80	96
44	43	44		32	32	32
43	42	43		32	48	48
45	45	45		32	32	80
44	43	44		80	80	80
44	44	44		80	80	80
43	43	43		64	80	96
43	43	43		32	64	48
44	44	44		64	48	32
44	44	44		32	48	32
43	44	44		64	80	80
45	45	45		32	48	32
44	44	44		48	48	48
45	44	45		32	32	32
42	43	42		64	80	64
44	44	44		32	32	48
45	45	45		32	32	48
45	45	45		48	48	48
