# Supplementary material for: Simultaneous brain, brainstem, and spinal cord pharmacological-fMRI reveals involvement of an endogenous opioid network in attentional analgesia
Source: eLife. 2022 Jan 26;11:e71877. doi: 10.7554/eLife.71877 (PMC8843089; doi:10.7554/eLife.71877)
Supplement: Figure 2—source data 1. [file elife-71877-fig2-data1.csv]

Placebo					Reboxetine					Naltrexone
Easy|Low	Hard|Low	Easy|High	Hard|High		Easy|Low	Hard|Low	Easy|High	Hard|High		Easy|Low	Hard|Low	Easy|High	Hard|High
0	0	27.8	17		0	0	26.8	22.2		0	0	15.5	17.8
0	0	59.2	57.2		8.5	19.5	22.5	13.5		0	0	25.8	39.5
2.8	2.2	52.2	46.8		12.2	27.8	19.8	33		0	2.2	25.5	31.8
1.5	0.5	38.2	40.8		1.2	1.2	33.8	29.5		27.5	16	7.8	21
3	0.2	45.2	45.8		3.8	4.8	58.2	45.5		10	5.5	66	59
12.8	8.2	47.5	51.2		0.8	0.5	43.2	41.5		6	3.8	51.2	50
8.5	11	61	63.8		8	4.8	52.5	50		6.5	6.5	36.8	42.2
0	0	19.8	9.5		0	0.5	38.2	21.5		2	0	44	15.2
7	5.8	33.5	26.8		12.5	11.5	35.5	29		9.5	7.2	30.5	33.2
0	0	50.8	42.8		0	0	50	51		2.2	0	52.2	40.5
4.8	2.5	34.8	37.2		1.8	6.8	40.8	51.5		0	0	32.5	31.5
2	2.8	63	59.8		0	0	49.2	21.2		0	0	32.2	47.5
0	11.5	41.5	39.8		4.8	1.8	40.5	38.5		0	9.5	47	45.2
0	0	55	38.2		0	0	20	10		0	0	27.8	27.5
0	0	11.8	8.2		0	0	26.2	22		0	0	35.2	38
0	1.2	50.2	51.5		6.8	9.8	36.5	55		0.2	0	40	43.5
0	0	3.5	2		4.2	2.2	19.8	12		0	0.8	8.8	5.8
0	0	51.2	52.5		0	0	26.2	26.2		0	0	51.2	47.5
0	0.5	4.8	10.8		0.2	2.2	27	19.5		0	0	16.2	13.5
0	0	30	31.5		0	0	26	24		0	0	29.8	24.8
0	0	45	37.8		0	0	46.5	30		0	0	38.8	20
0.2	0.2	79	73		9.8	10	70.8	71		10.8	26.5	82.2	74.2
3	3.5	45.8	42		0	0	31.8	26.8		0	0	50	42.5
0.2	3.2	22.2	25.2		0.8	1	7.8	8.5		0.8	0	8.5	4
0	4.2	51.5	39.5		0.8	0	37.5	20.8		1.2	2.8	42.5	51
5.2	7	40.2	38.2		12	2.5	37	43.8		8.8	5.2	39.5	43
0	0	65.8	63.8		1	1.5	39.5	28		0.2	0	53.2	57.2
0	0	67.5	63		0	0	57	52.8		1.2	0	68	60.2
0	0	17.5	19.2		0	0	15.5	21.2		1.5	2.5	18.8	23.5
2.8	6.2	61	56		4.8	9	43	46.5		5.5	4.2	46.8	52.5
0	0.5	53.2	56.8		0	0	42	44.2		0	0	37	42
0	2.8	29.2	14.8		3	0.2	66	50.8		15.2	8.8	76.5	69.8
2.8	2	45	45		0	0	31.8	27.2		0	0	61	56.8
0	0	8.2	10.2		0	0	21.5	16.8		0	0	23.8	19.2
0	1.5	19.5	12.2		2	0	16.8	10		3.2	9.2	28	27.2
0	0	13	13.5		0	0	9.2	9.5		0	1	25.2	19.5
7.8	5.2	62.2	52.2		5.2	2.5	54	45.5		7.5	0	40.5	44.8
31.8	31	61	57.5		23.2	26	54	53.8		21.2	36.5	57.5	53.2
2	0	9.2	9		0	0	13.5	19.2		0	0.5	18.8	22.5
