# Supplementary material for: Simultaneous brain, brainstem, and spinal cord pharmacological-fMRI reveals involvement of an endogenous opioid network in attentional analgesia
Source: eLife. 2022 Jan 26;11:e71877. doi: 10.7554/eLife.71877 (PMC8843089; doi:10.7554/eLife.71877)
Supplement: Figure 2—source data 2. [file elife-71877-fig2-data2.csv]

Placebo			Reboxetine			Naltrexone
Pain_score	PE_SPINALnoci		Pain_score	PE_SPINALnoci		Pain_score	PE_SPINALnoci
0	-4.802		0	-2.546		0	-1.011
0	-1.068		8.5	0.8172		0	-16.45
2.8	-0.3219		12.2	-0.8228		0	-0.4409
1.5	1.621		1.2	0.1705		27.5	-0.124
3	0.469		3.8	-0.1513		10	1.815
12.8	0.4449		0.8	10.59		6	-2.385
8.5	-6.039		8	-0.8534		6.5	-3.363
0	0.2943		0	8.991		2	-10.32
7	0.06209		12.5	1.866		9.5	1.318
0	-4.717		0	-2.609		2.2	0.3921
4.8	-2.851		1.8	1.401		0	-1.14
2	-2.347		0	0.2038		0	-0.3525
0	0.3196		4.8	-20.43		0	-0.2534
0	-0.3314		0	-0.06046		0	-3.237
0	-0.936		0	-3.18		0	1.503
0	-2.694		6.8	0.7718		0.2	-0.5912
0	-0.2027		4.2	1.206		0	-0.4497
0	-4.752		0	-1.321		0	0.002172
0	-0.9361		0.2	0.8127		0	1.099
0	0.2915		0	-1.099		0	-4.634
0	-0.5692		0	-0.2913		0	0.5446
0.2	0.9041		9.8	-1.963		10.8	0.9108
3	0.2824		0	1.719		0	1.016
0.2	-0.3919		0.8	-4.241		0.8	-0.6373
0	-2.845		0.8	1.428		1.2	-1.971
5.2	0.6803		12	2.905		8.8	6.281
0	0.879		1	-0.0638		0.2	-0.2234
0	1.446		0	-1.746		1.2	-0.4281
0	-0.2492		0	-1.122		1.5	-3.394
2.8	-3.233		4.8	-1.693		5.5	0.8438
0	-4.087		0	1.137		0	-0.21
0	-1.294		3	-1.411		15.2	-0.8067
2.8	-4.919		0	0.1446		0	-4.391
0	-2.689		0	1.559		0	-8.241
0	-3.747		2	0.4095		3.2	-1.38
0	2.893		0	-0.3389		0	-0.1945
7.8	2.115		5.2	-1.738		7.5	-3.584
31.8	2.081		23.2	-0.2538		21.2	-3.226
2	-2.167		0	-0.08471		0	-1.397
0	-3.986		0	0.1446		0	-2.398
0	0.5279		19.5	-1.702		0	-4.971
2.2	0.2445		27.8	-3.24		2.2	-0.691
0.5	-0.3975		1.2	-0.6747		16	1.489
0.2	-1.115		4.8	-2.287		5.5	-3.186
8.2	-0.825		0.5	0.01001		3.8	-1.949
11	-4.823		4.8	-0.4945		6.5	0.5073
0	-1.072		0.5	3.644		0	-13.47
5.8	-1.937		11.5	0.8065		7.2	-0.02648
0	-3.55		0	-3.052		0	0.1318
2.5	-3.447		6.8	-0.7742		0	-0.1802
2.8	-0.103		0	1.187		0	-0.9743
11.5	-2.559		1.8	-0.8634		9.5	-13.81
0	-1.142		0	0.02017		0	2.016
0	0.3157		0	-0.2279		0	1.153
1.2	-2.08		9.8	0.9654		0	0.479
0	-0.2319		2.2	-0.6616		0.8	-1.427
0	-9.081		0	-3.551		0	-1.053
0.5	-2.884		2.2	0.6906		0	0.7834
0	-1.165		0	3.852		0	-2.585
0	-0.906		0	0.3388		0	-0.4853
0.2	-0.5381		10	8.115		26.5	-1.56
3.5	-2.455		0	-0.668		0	-3.545
3.2	-1.752		1	0.9812		0	-0.2436
4.2	-5.039		0	1.178		2.8	-1.856
7	2.056		2.5	0.2263		5.2	2.177
0	-0.7337		1.5	-1.057		0	-3.656
0	2.002		0	-0.7823		0	-2.573
0	-1.356		0	-2.613		2.5	-1.067
6.2	1.089		9	-0.9353		4.2	-0.8532
0.5	-2.247		0	1.717		0	-1.328
2.8	-2.569		0.2	-1.419		8.8	-5.713
2	-0.1419		0	-2.846		0	-2.215
0	-2.464		0	-10.61		0	4.51
1.5	-0.8627		0	0.1893		9.2	-0.426
0	1.441		0	-0.8564		1	-0.3387
5.2	-3.81		2.5	0.9452		0	6.265
31	-1.495		26	-0.08597		36.5	-6.1
0	-0.09494		0	-1.304		0.5	-2.007
27.8	6.346		26.8	8.28		15.5	-0.1873
59.2	10.35		22.5	1.922		25.8	10.27
52.2	7.732		19.8	2.259		25.5	0.6308
38.2	3.625		33.8	1.566		7.8	10.24
45.2	0.9445		58.2	0.6347		66	-0.2574
47.5	3.625		43.2	13.94		51.2	-0.02796
61	2.316		52.5	3.039		36.8	-0.3205
19.8	0.8372		38.2	9.88		44	0.2753
33.5	4.412		35.5	3.956		30.5	69.09
50.8	0.1621		50	-1.145		52.2	5.064
34.8	1.146		40.8	3.774		32.5	1.009
63	1.464		49.2	6.617		32.2	0.5318
41.5	2.928		40.5	30.75		47	6.787
55	1.422		20	1.162		27.8	1.491
11.8	4.918		26.2	1.341		35.2	5.264
50.2	0.5271		36.5	5.633		40	2.486
3.5	1.077		19.8	2.773		8.8	0.9997
51.2	4.197		26.2	-0.7188		51.2	1.466
4.8	0.3836		27	1.795		16.2	5.758
30	1.311		26	3.179		29.8	0.7794
45	0.4919		46.5	5.152		38.8	1.905
79	5.453		70.8	27.68		82.2	0.7973
45.8	0.7944		31.8	4.412		50	1.523
22.2	19.47		7.8	1.756		8.5	1.205
51.5	1.411		37.5	1.665		42.5	0.7352
40.2	16.74		37	10.89		39.5	54.32
65.8	25.21		39.5	3.178		53.2	3.965
67.5	12.27		57	4.854		68	6.223
17.5	0.3389		15.5	-0.03315		18.8	0.136
61	-1.896		43	0.873		46.8	1.581
53.2	-1.44		42	54.99		37	6.183
29.2	0.2181		66	-0.1519		76.5	2.334
45	7.06		31.8	2.503		61	5.86
8.2	0.1332		21.5	4.193		23.8	2.946
19.5	17.67		16.8	6.799		28	7.27
13	6.206		9.2	1.697		25.2	1.522
62.2	9.246		54	1.938		40.5	31.26
61	4.792		54	7.471		57.5	4.202
9.2	-0.4952		13.5	0.9231		18.8	3.269
17	6.588		22.2	2.501		17.8	-1.02
57.2	5.647		13.5	1.452		39.5	19.66
46.8	8.445		33	0.2692		31.8	0.8846
40.8	5.807		29.5	4.412		21	7.546
45.8	0.8194		45.5	1.391		59	5.702
51.2	2.246		41.5	11.2		50	0.8123
63.8	4.014		50	0.6287		42.2	1.127
9.5	1.007		21.5	16.25		15.2	-9.004
26.8	2.467		29	2.506		33.2	54.04
42.8	0.1862		51	1.701		40.5	2.194
37.2	-3.774		51.5	3.293		31.5	1.192
59.8	3.049		21.2	10.64		47.5	1.935
39.8	0.7179		38.5	-7.003		45.2	9.629
38.2	2.779		10	1.137		27.5	2.542
8.2	-1.681		22	4.866		38	6.81
51.5	1.159		55	4.646		43.5	1.403
2	0.1241		12	4.831		5.8	0.112
52.5	-2.509		26.2	0.5052		47.5	1.797
10.8	0.2884		19.5	5.136		13.5	-0.6051
31.5	0.9883		24	5.906		24.8	-3.253
37.8	2.285		30	2.341		20	3.016
73	0.5099		71	10.08		74.2	5.466
42	1.371		26.8	0.7974		42.5	1.611
25.2	27.05		8.5	6.117		4	1.722
39.5	5.939		20.8	2.367		51	0.5518
38.2	16.26		43.8	8.726		43	44.75
63.8	18.86		28	3.677		57.2	8.948
63	8.185		52.8	2.66		60.2	7.054
19.2	1.034		21.2	-0.402		23.5	1.577
56	3.78		46.5	1.651		52.5	0.6105
56.8	1.837		44.2	16.46		42	3.829
14.8	-1.332		50.8	0.006674		69.8	5.591
45	-0.4878		27.2	3.542		56.8	2.992
10.2	-0.7549		16.8	4.146		19.2	11.73
12.2	9.377		10	4.299		27.2	4.259
13.5	11.75		9.5	1.537		19.5	0.1149
52.2	8.094		45.5	6.478		44.8	42.42
57.5	2.188		53.8	9.946		53.2	4.967
9	2.072		19.2	1.523		22.5	0.8634
