# Supplementary material for: Simultaneous brain, brainstem, and spinal cord pharmacological-fMRI reveals involvement of an endogenous opioid network in attentional analgesia
Source: eLife. 2022 Jan 26;11:e71877. doi: 10.7554/eLife.71877 (PMC8843089; doi:10.7554/eLife.71877)
Supplement: Figure 2—source data 3. [file elife-71877-fig2-data3.csv]

Placebo					Reboxetine					Naltrexone
EasyLow	HardLow	EasyHigh	HardHigh		EasyLow	HardLow	EasyHigh	HardHigh		EasyLow	HardLow	EasyHigh	HardHigh
-4.802	-3.986	6.346	6.588		-2.546	0.1446	8.28	2.501		-1.011	-2.398	-0.1873	-1.02
-1.068	0.5279	10.35	5.647		0.8172	-1.702	1.922	1.452		-16.45	-4.971	10.27	19.66
-0.3219	0.2445	7.732	8.445		-0.8228	-3.24	2.259	0.2692		-0.4409	-0.691	0.6308	0.8846
1.621	-0.3975	3.625	5.807		0.1705	-0.6747	1.566	4.412		-0.124	1.489	10.24	7.546
0.469	-1.115	0.9445	0.8194		-0.1513	-2.287	0.6347	1.391		1.815	-3.186	-0.2574	5.702
0.4449	-0.825	3.625	2.246		10.59	0.01001	13.94	11.2		-2.385	-1.949	-0.02796	0.8123
-6.039	-4.823	2.316	4.014		-0.8534	-0.4945	3.039	0.6287		-3.363	0.5073	-0.3205	1.127
0.2943	-1.072	0.8372	1.007		8.991	3.644	9.88	16.25		-10.32	-13.47	0.2753	-9.004
0.06209	-1.937	4.412	2.467		1.866	0.8065	3.956	2.506		1.318	-0.02648	69.09	54.04
-4.717	-3.55	0.1621	0.1862		-2.609	-3.052	-1.145	1.701		0.3921	0.1318	5.064	2.194
-2.851	-3.447	1.146	-3.774		1.401	-0.7742	3.774	3.293		-1.14	-0.1802	1.009	1.192
-2.347	-0.103	1.464	3.049		0.2038	1.187	6.617	10.64		-0.3525	-0.9743	0.5318	1.935
0.3196	-2.559	2.928	0.7179		-20.43	-0.8634	30.75	-7.003		-0.2534	-13.81	6.787	9.629
-0.3314	-1.142	1.422	2.779		-0.06046	0.02017	1.162	1.137		-3.237	2.016	1.491	2.542
-0.936	0.3157	4.918	-1.681		-3.18	-0.2279	1.341	4.866		1.503	1.153	5.264	6.81
-2.694	-2.08	0.5271	1.159		0.7718	0.9654	5.633	4.646		-0.5912	0.479	2.486	1.403
-0.2027	-0.2319	1.077	0.1241		1.206	-0.6616	2.773	4.831		-0.4497	-1.427	0.9997	0.112
-4.752	-9.081	4.197	-2.509		-1.321	-3.551	-0.7188	0.5052		0.002172	-1.053	1.466	1.797
-0.9361	-2.884	0.3836	0.2884		0.8127	0.6906	1.795	5.136		1.099	0.7834	5.758	-0.6051
0.2915	-1.165	1.311	0.9883		-1.099	3.852	3.179	5.906		-4.634	-2.585	0.7794	-3.253
-0.5692	-0.906	0.4919	2.285		-0.2913	0.3388	5.152	2.341		0.5446	-0.4853	1.905	3.016
0.9041	-0.5381	5.453	0.5099		-1.963	8.115	27.68	10.08		0.9108	-1.56	0.7973	5.466
0.2824	-2.455	0.7944	1.371		1.719	-0.668	4.412	0.7974		1.016	-3.545	1.523	1.611
-0.3919	-1.752	19.47	27.05		-4.241	0.9812	1.756	6.117		-0.6373	-0.2436	1.205	1.722
-2.845	-5.039	1.411	5.939		1.428	1.178	1.665	2.367		-1.971	-1.856	0.7352	0.5518
0.6803	2.056	16.74	16.26		2.905	0.2263	10.89	8.726		6.281	2.177	54.32	44.75
0.879	-0.7337	25.21	18.86		-0.0638	-1.057	3.178	3.677		-0.2234	-3.656	3.965	8.948
1.446	2.002	12.27	8.185		-1.746	-0.7823	4.854	2.66		-0.4281	-2.573	6.223	7.054
-0.2492	-1.356	0.3389	1.034		-1.122	-2.613	-0.03315	-0.402		-3.394	-1.067	0.136	1.577
-3.233	1.089	-1.896	3.78		-1.693	-0.9353	0.873	1.651		0.8438	-0.8532	1.581	0.6105
-4.087	-2.247	-1.44	1.837		1.137	1.717	54.99	16.46		-0.21	-1.328	6.183	3.829
-1.294	-2.569	0.2181	-1.332		-1.411	-1.419	-0.1519	0.006674		-0.8067	-5.713	2.334	5.591
-4.919	-0.1419	7.06	-0.4878		0.1446	-2.846	2.503	3.542		-4.391	-2.215	5.86	2.992
-2.689	-2.464	0.1332	-0.7549		1.559	-10.61	4.193	4.146		-8.241	4.51	2.946	11.73
-3.747	-0.8627	17.67	9.377		0.4095	0.1893	6.799	4.299		-1.38	-0.426	7.27	4.259
2.893	1.441	6.206	11.75		-0.3389	-0.8564	1.697	1.537		-0.1945	-0.3387	1.522	0.1149
2.115	-3.81	9.246	8.094		-1.738	0.9452	1.938	6.478		-3.584	6.265	31.26	42.42
2.081	-1.495	4.792	2.188		-0.2538	-0.08597	7.471	9.946		-3.226	-6.1	4.202	4.967
-2.167	-0.09494	-0.4952	2.072		-0.08471	-1.304	0.9231	1.523		-1.397	-2.007	3.269	0.8634
