# Supplementary material for: Simultaneous brain, brainstem, and spinal cord pharmacological-fMRI reveals involvement of an endogenous opioid network in attentional analgesia
Source: eLife. 2022 Jan 26;11:e71877. doi: 10.7554/eLife.71877 (PMC8843089; doi:10.7554/eLife.71877)
Supplement: Figure 2—source data 4. [file elife-71877-fig2-data4.csv]

Placebo					Reboxetine					Naltrexone
Easy|Low	Hard|Low	Easy|High	Hard|High		Easy|Low	Hard|Low	Easy|High	Hard|High		Easy|Low	Hard|Low	Easy|High	Hard|High
-0.2493	-0.622	-4.874	-2.655		3.317	-0.2761	2.589	1.487		1.836	-0.529	-1.195	2.271
1.458	-3.827	-10.87	5.271		3.687	-8.33	-3.401	1.661		2.909	-7.256	-4.704	-3.223
1.867	0.1988	-2.752	1.025		-0.7748	-1.793	-1.003	0.7428		0.4667	-1.686	0.09446	0.9326
1.06	0.1902	0.9637	3.759		0.2334	-2.168	-1.419	3.268		0.5871	-0.064	-9.382	-4.253
4.535	0.3637	-0.2863	3.504		-0.4985	-3.955	-2.005	6.332		1.815	-3.186	-0.2574	5.702
4.657	-1.322	1.713	4.589		3.648	1.545	-0.06434	3.941		2.055	-1.333	-1.718	0.7922
0.203	-5.109	-4.212	4.359		0.00885	-1.451	-1.15	0.785		0.9039	-1.737	0.1067	0.3658
6.449	1.502	-1.86	-0.3462		4.314	5.479	-0.851	8.118		10.49	5.007	5.431	12.95
1.237	0.008923	-3.386	-0.6643		0.8472	-0.6826	-0.2313	1.253		2.536	-3.126	-47.9	-41.44
0.2536	-1.444	-0.8513	1.09		-1.426	-4.832	-3.723	1.251		-0.3898	-0.6714	-5.32	3.709
6.884	3.69	0.1496	3.958		1.14	-1.055	1.273	2.009		-0.4093	-0.4378	-0.9217	1.605
0.5375	-0.09258	0.4687	3.819		1.058	-1.385	0.934	7.201		0.7637	-1.344	0.07507	0.369
2.691	3.005	-4.707	0.9237		-9.973	1.76	-26.93	9.351		1.107	-7.834	-2.245	4.11
-0.2525	1.508	0.509	12.32		0.9102	-0.8228	0.2114	0.1694		0.73	-2.216	-0.3968	2.487
1.419	4.462	-2.612	5.125		0.8983	-2.062	-1.292	1.04		0.8113	-13.13	-6.853	-4.544
3.339	-1.772	-1.257	-0.4304		0.2409	-1.908	-0.9409	0.5933		0.1866	-1.803	-1.638	1.086
0.7263	0.07645	0.1591	1.88		1.895	-1.209	0.2605	0.6729		0.8005	0.9822	-1.063	1.055
1.585	-1.142	1.047	3.968		0.5528	-5.925	-3.155	4.059		3.739	-3.414	-1.637	1.434
1.27	-0.3159	-0.2962	1.639		1.533	2.042	-1.812	4.186		-0.1348	0.3866	-5.846	6.005
0.5583	-0.2897	-3.264	1.584		1.2	-2.981	-3.008	-1.502		1	-2.12	-1.903	0.8077
1.835	-1.026	-2.175	0.5782		2.576	-1.625	-1.613	1.208		-0.5277	-1.164	-0.6531	2.751
1.021	-0.6592	-6.221	-3.222		1.615	-2.938	-2.575	-1.37		0.9108	-1.56	0.7973	5.466
-1.005	-4.496	-3.185	-2.6		1.092	-8.93	-5.691	-3.92		1.016	-3.545	1.523	1.611
1.819	-3.327	-3.316	10.93		-1.545	-0.5028	-2.314	2.234		0.433	-1.081	-1.666	1.98
-0.7026	-4.133	-1.321	2.878		-0.4151	-0.8392	-1.609	0.1414		0.05622	-2.056	-6.397	3.241
1.894	0.1345	-9.031	-0.732		3.508	-2.27	2.04	4.94		3.512	2.349	2.359	9.604
2.413	-2.505	-4.914	9.383		0.5845	-0.2108	-1.805	0.2881		-0.2234	-3.656	3.965	8.948
-3.446	-4.745	-26.68	-20.22		1.665	-2.122	4.606	8.956		2.814	-0.1886	7.316	12.89
2.823	-1.845	0.8873	2.756		-0.3408	-0.5266	-1.89	0.6128		-0.1835	-12.28	-8.829	-6.925
0.9493	-1.121	-1.852	2		1.263	1.084	-1.235	1.414		4.513	-0.3019	1.015	2.786
2.262	-0.8349	-2.733	0.3015		-0.4815	-0.2562	-4.295	-1.563		-4.46	-0.7775	-39.59	12.24
-1.363	-4.695	-3.011	-3.187		1.337	-0.9516	0.8012	1.15		-0.7625	-4.15	1.31	4.293
3.026	-1.266	-5.777	0.8536		2.438	-2.908	-1.305	4.629		-0.4108	-4.874	-3.954	-4.764
0.3229	-1.229	-0.615	0.1684		1.559	-10.61	4.193	4.146		1.912	-2.509	-1.716	-1.501
-1.77	-3.53	-6.672	6.502		0.4827	-1.467	-1.278	0.6373		0.517	-3.589	-4.228	1.933
2.893	1.441	6.206	11.75		1.969	2.323	-0.8537	6.292		1.28	-0.2953	-0.7478	0.1432
10.48	6.583	-11.85	29.3		3.944	-0.1131	-1.451	4.115		-1.155	0.05158	0.2075	8.715
6.126	-0.2614	-1.084	4.333		-0.477	4.225	11.27	35.52		-4.087	-20.08	3.108	8.726
1.372	-0.7666	-2.572	-1.54		0.2787	-0.5621	-0.7034	1.063		1.863	-2.658	-19.77	-1.304
