# Supplementary material for: Simultaneous brain, brainstem, and spinal cord pharmacological-fMRI reveals involvement of an endogenous opioid network in attentional analgesia
Source: eLife. 2022 Jan 26;11:e71877. doi: 10.7554/eLife.71877 (PMC8843089; doi:10.7554/eLife.71877)
Supplement: Figure 2—source data 5. [file elife-71877-fig2-data5.csv]

Placebo	Placebo	Reboxetine	Reboxetine	Naltrexone	Naltrexone			Placebo	Placebo	Reboxetine	Reboxetine	Naltrexone	Naltrexone
Easy|Low	Hard|Low	Easy|Low	Hard|Low	Easy|Low	Hard|Low			Easy|High	Hard|High	Easy|High	Hard|High	Easy|High	Hard|High
0	0	0	0	0	0			27.8	17	26.8	22.2	15.5	17.8
0	0	8.5	19.5	0	0			59.2	57.2	22.5	13.5	25.8	39.5
2.8	2.2	12.2	27.8	0	2.2			52.2	46.8	19.8	33	25.5	31.8
1.5	0.5	1.2	1.2	27.5	16			38.2	40.8	33.8	29.5	7.8	21
3	0.2	3.8	4.8	10	5.5			45.2	45.8	58.2	45.5	66	59
12.8	8.2	0.8	0.5	6	3.8			47.5	51.2	43.2	41.5	51.2	50
8.5	11	8	4.8	6.5	6.5			61	63.8	52.5	50	36.8	42.2
0	0	0	0.5	2	0			19.8	9.5	38.2	21.5	44	15.2
7	5.8	12.5	11.5	9.5	7.2			33.5	26.8	35.5	29	30.5	33.2
0	0	0	0	2.2	0			50.8	42.8	50	51	52.2	40.5
4.8	2.5	1.8	6.8	0	0			34.8	37.2	40.8	51.5	32.5	31.5
2	2.8	0	0	0	0			63	59.8	49.2	21.2	32.2	47.5
0	11.5	4.8	1.8	0	9.5			41.5	39.8	40.5	38.5	47	45.2
0	0	0	0	0	0			55	38.2	20	10	27.8	27.5
0	0	0	0	0	0			11.8	8.2	26.2	22	35.2	38
0	1.2	6.8	9.8	0.2	0			50.2	51.5	36.5	55	40	43.5
0	0	4.2	2.2	0	0.8			3.5	2	19.8	12	8.8	5.8
0	0	0	0	0	0			51.2	52.5	26.2	26.2	51.2	47.5
0	0.5	0.2	2.2	0	0			4.8	10.8	27	19.5	16.2	13.5
0	0	0	0	0	0			30	31.5	26	24	29.8	24.8
0	0	0	0	0	0			45	37.8	46.5	30	38.8	20
0.2	0.2	9.8	10	10.8	26.5			79	73	70.8	71	82.2	74.2
3	3.5	0	0	0	0			45.8	42	31.8	26.8	50	42.5
0.2	3.2	0.8	1	0.8	0			22.2	25.2	7.8	8.5	8.5	4
0	4.2	0.8	0	1.2	2.8			51.5	39.5	37.5	20.8	42.5	51
5.2	7	12	2.5	8.8	5.2			40.2	38.2	37	43.8	39.5	43
0	0	1	1.5	0.2	0			65.8	63.8	39.5	28	53.2	57.2
0	0	0	0	1.2	0			67.5	63	57	52.8	68	60.2
0	0	0	0	1.5	2.5			17.5	19.2	15.5	21.2	18.8	23.5
2.8	6.2	4.8	9	5.5	4.2			61	56	43	46.5	46.8	52.5
0	0.5	0	0	0	0			53.2	56.8	42	44.2	37	42
0	2.8	3	0.2	15.2	8.8			29.2	14.8	66	50.8	76.5	69.8
2.8	2	0	0	0	0			45	45	31.8	27.2	61	56.8
0	0	0	0	0	0			8.2	10.2	21.5	16.8	23.8	19.2
0	1.5	2	0	3.2	9.2			19.5	12.2	16.8	10	28	27.2
0	0	0	0	0	1			13	13.5	9.2	9.5	25.2	19.5
7.8	5.2	5.2	2.5	7.5	0			62.2	52.2	54	45.5	40.5	44.8
31.8	31	23.2	26	21.2	36.5			61	57.5	54	53.8	57.5	53.2
2	0	0	0	0	0.5			9.2	9	13.5	19.2	18.8	22.5
