# Supplementary material for: Simultaneous brain, brainstem, and spinal cord pharmacological-fMRI reveals involvement of an endogenous opioid network in attentional analgesia
Source: eLife. 2022 Jan 26;11:e71877. doi: 10.7554/eLife.71877 (PMC8843089; doi:10.7554/eLife.71877)
Supplement: Figure 4—source data 1. [file elife-71877-fig4-data1.csv]

PAG-ACC			RVM-PAG			RVM-LC			RVM-DH
Easy|High	Hard|High		Easy|High	Hard|High		Easy|High	Hard|High		Easy|High	Hard|High
0.04275	0.1409		0.6336	-0.5729		0.6598	0.7815		-2.475	-1.573
-0.574	0.6133		-0.2353	0.1212		0.04959	0.243		-5.03	6.776
0.1258	0.3476		6.061	3.186		0.09139	0.6795		-7.82	-1.454
-0.1473	0.04216		0.6585	0.7229		-0.1055	0.3994		-0.6917	1.506
-0.3797	0.388		-0.3743	0.04656		0.1752	1.352		-3.079	5.591
-0.3646	0.4896		-1.4	-0.4521		0.2448	0.9431		-4.678	2.357
-0.2509	0.1651		-1.268	0.3679		-0.3653	-0.8313		-5.592	2.502
-0.04512	0.2466		-0.1349	0.163		0.3379	-0.02711		-2.45	4.039
0.2423	0.3533		0.4001	0.8414		0.894	1.406		-0.8672	0.4717
-0.3001	0.06562		-0.333	-0.07502		-0.2348	-0.1398		-0.1899	1.571
-0.1198	0.3979		-1.178	-0.6848		-1.522	-0.03451		1.467	4.493
-0.07128	0.6982		-0.3888	0.4268		0.338	0.4773		1.123	1.535
-0.2915	1.056		-0.7494	-0.1909		0.4657	1.193		-7.294	-1.932
-0.1635	0.3242		-0.07697	0.4177		-0.01577	0.3247		1.477	3.692
-0.319	0.2374		-0.4357	0.5315		-0.4771	-0.1574		-15.53	5.11
-0.05783	0.3512		-0.244	0.1179		-0.3213	-0.2051		-0.2761	1.817
-0.1713	0.1092		0.01253	0.5641		0.1381	0.3153		-3.407	1.686
-0.5975	-0.00529		0.7764	1.033		-0.1566	-0.2866		0.2408	5.973
-0.1887	-0.2146		-0.6706	-0.141		-0.6738	0.2551		-3.335	-0.5891
-0.6792	0.1658		-0.9545	0.365		-0.5024	0.06752		1.24	3.22
-0.3484	0.05408		0.8381	0.7559		0.3388	0.4087		-3.997	3.966
0.02118	0.02592		-0.4079	-0.1124		0.1541	0.3033		-4.958	6.107
-0.1854	-0.2974		-0.06849	0.6461		-0.8522	0.358		-2.801	13.46
-0.9163	0.3334		0.3684	0.508		2.175	1.771		-1.149	5.712
-0.5138	0.242		-0.4627	0.03587		0.8488	0.5179		-4.056	-2.12
-0.3271	1.022		0.2723	1.164		-0.00499	-0.1557		0.1794	39.43
-0.3112	0.1509		0.9683	0.8333		0.1927	-0.4798		-1.206	4.386
-0.3047	0.4276		-0.425	0.8194		-0.4703	0.5659		-2	-1.391
0.07637	0.4705		0.3005	0.784		1.078	0.4398		-3.223	1.13
-0.6385	0.3978		-1.044	-1.059		0.5371	-0.6553		-3.761	6.732
0.004638	0.273		-0.349	0.4156		-1.511	-0.9166		-7.132	1.989
-0.06698	0.457		-0.3767	0.1354		0.1851	0.3458		-2.162	2.61
0.009077	0.1386		-0.4354	-0.5295		0.2268	0.2784		-5.608	10.49
-0.4737	0.132		-0.5971	-0.8921		0.5023	0.3145		-1.207	2.509
-0.9815	0.758		-0.6291	-0.114		-0.131	0.2999		-0.3263	5.558
0.08475	1.017		-0.4342	-0.6144		0.4706	0.5841		1.861	3.856
-0.1954	0.1517		-1.417	-0.8563		0.1748	0.007002		-11.03	5.754
-0.4475	-0.07971		-0.3142	0.451		0.6332	0.6268		-4.407	7.966
-0.1378	-0.7178		-1.015	0.4526		-0.04584	0.3134		-9.835	-2.517
