# Supplementary material for: Simultaneous brain, brainstem, and spinal cord pharmacological-fMRI reveals involvement of an endogenous opioid network in attentional analgesia
Source: eLife. 2022 Jan 26;11:e71877. doi: 10.7554/eLife.71877 (PMC8843089; doi:10.7554/eLife.71877)
Supplement: Figure 5—source data 1. [file elife-71877-fig5-data1.csv]

PAG - ACC main effect of task					RVM - DH task * temperature interaction
Placebo	Reboxetine	Naltrexone			Placebo	Reboxetine	Naltrexone
-0.11006	0.1417	-0.63284			4.335	11.326	6.905
0.73844	0.11788	0.1011			20.2653	11.131	30.769
-0.11024	0.19098	0.17659			15.294	4.1548	8.034
-0.02911	0.21296	0.19104			6.3357	8.1899	18.373
0.83321	0.06398	-0.66329			12.754	7.5132	8.898
0.7922	0.14191	0.85			14.504	11.8666	6.307
-0.2438	-0.39295	0.1373			13.029	6.6917	6.3998
0.026403	0.07651	0.12058			8.928	12.345	10.0709
-0.5971	0.06997	-0.5674			8.3289	5.6001	14.246
0.303134	0.31289	-0.43206			6.1369	8.853	4.1533
0.17317	-0.144508	-0.42024			3.267	5.8735	5.7559
0.78311	0.13756	-0.69027			4.246	13.239	5.0864
0.42885	0.5201	0.16046			33.471	28.651	25.96
0.52656	0.17523	-0.41059			7.891	2.6219	12.447
0.01799	0.67261	-0.10528			15.84	23.352	10.8491
-0.066211	-0.0165	-0.21842			3.91256	13.0765	5.786071
0.251442	-0.55196	0.11654			6.8756	3.9603	4.57301
0.2356	-0.05266	-0.8457			15.2052	9.607	12.8877
-0.08333	-0.5128	0.43728			6.0039	40.856	8.1599
-0.4594	-0.34582	-0.0718			6.32	11.976	3.1824
0.5264	-0.0808	1.3005			11.952	24.539	6.8798
-0.64273	-0.196387	0.068209			15.2118	27.106	13.026
0.10817	-0.30644	0.0905			34.209	11.1852	6.02728
0.7611	-0.664537	0.09875			9.565	16.753	6.5019
0.574	-0.467043	-0.048381			4.8564	5.8735	6.82222
-1.1341	-0.6354	-0.50419			52.5776	5.96366	10.9
-0.1481	0.48126	-0.23543			7.2333	6.7706	11.9575
0.420297	-0.33008	-0.19784			10.855	19.425	8.8559
-0.39187	-2.0124	0.87817			9.7206	5.89969	6.20984
0.087411	-0.17466	-0.24092			21.534	3.2944	4.87854
-0.4672	0.23816	-1.3483			4.591	6.3511	1.3108
0.06774	-0.274295	0.0029			7.0812	12.491	6.505
-0.57766	-0.32651	0.00054			25.453	24.0518	12.06
0.12238	0.09881	-0.32798			6.0432	4.95232	4.15521
0.6166	0.46914	-0.05003			7.3074	12.55	13.3683
1.34692	1.42388	0.26126			3.18764	8.562	9.322
0.16633	1.5228	-0.3977			20.012	13.9614	3.6158
0.27115	0.49549	-1.81293			20.677	26.3124	33.17854
0.51576	0.00463	0.70129			16.7555	3.25559	6.407
