# Supplementary material for: Simultaneous brain, brainstem, and spinal cord pharmacological-fMRI reveals involvement of an endogenous opioid network in attentional analgesia
Source: eLife journal article supplement (doi:10.7554/elife.71877), 2022-01-26

Figure 2 Supplementary Figure 5

Main effect of temperature

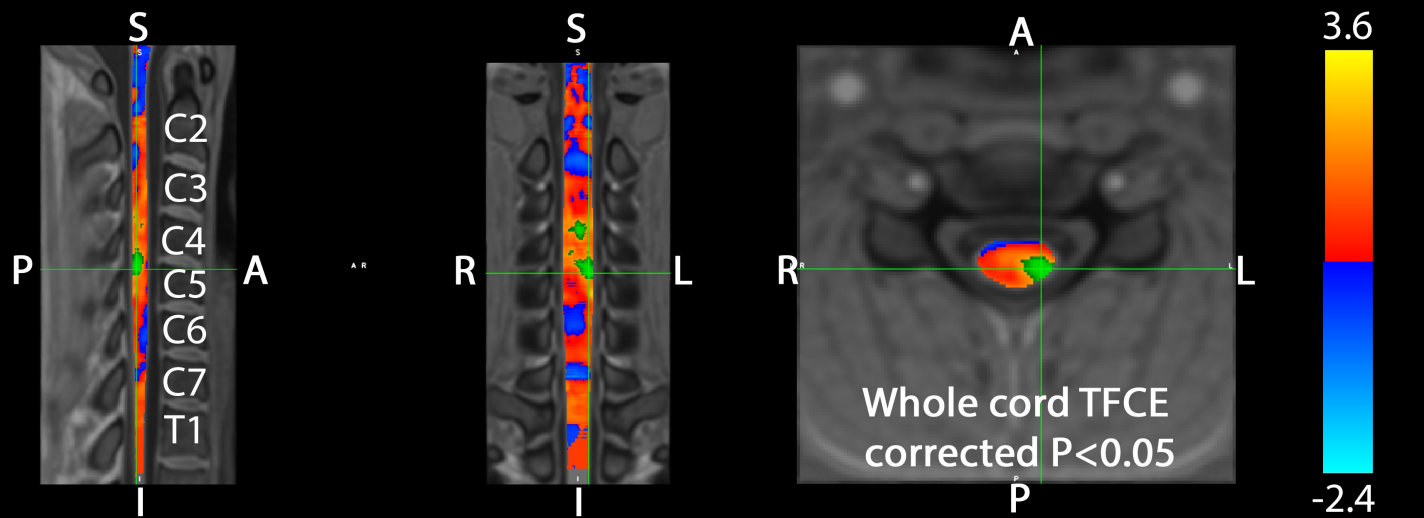

Main effect of task

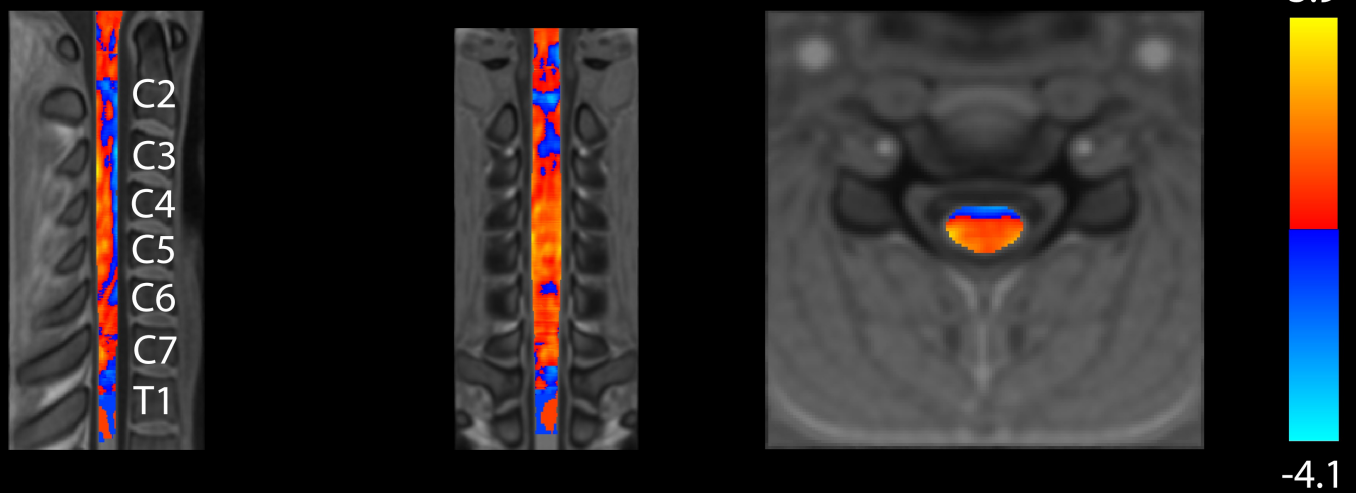

Task \* temperature interaction

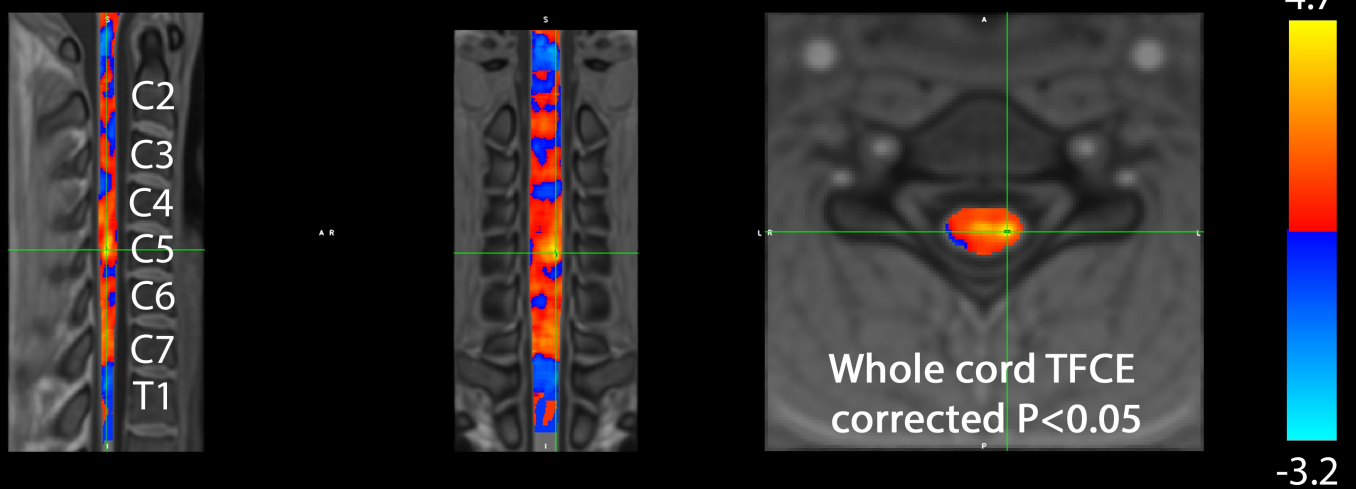

Supplement: supp [file elife-71877-supp-v1.zip]
