# Supplementary material for: Simultaneous brain, brainstem, and spinal cord pharmacological-fMRI reveals involvement of an endogenous opioid network in attentional analgesia
Source: eLife journal article supplement (doi:10.7554/elife.71877), 2022-01-26
Supplement: supp [file elife-71877-supp-v1.zip]

Figure 2 Supplementary Figure 1

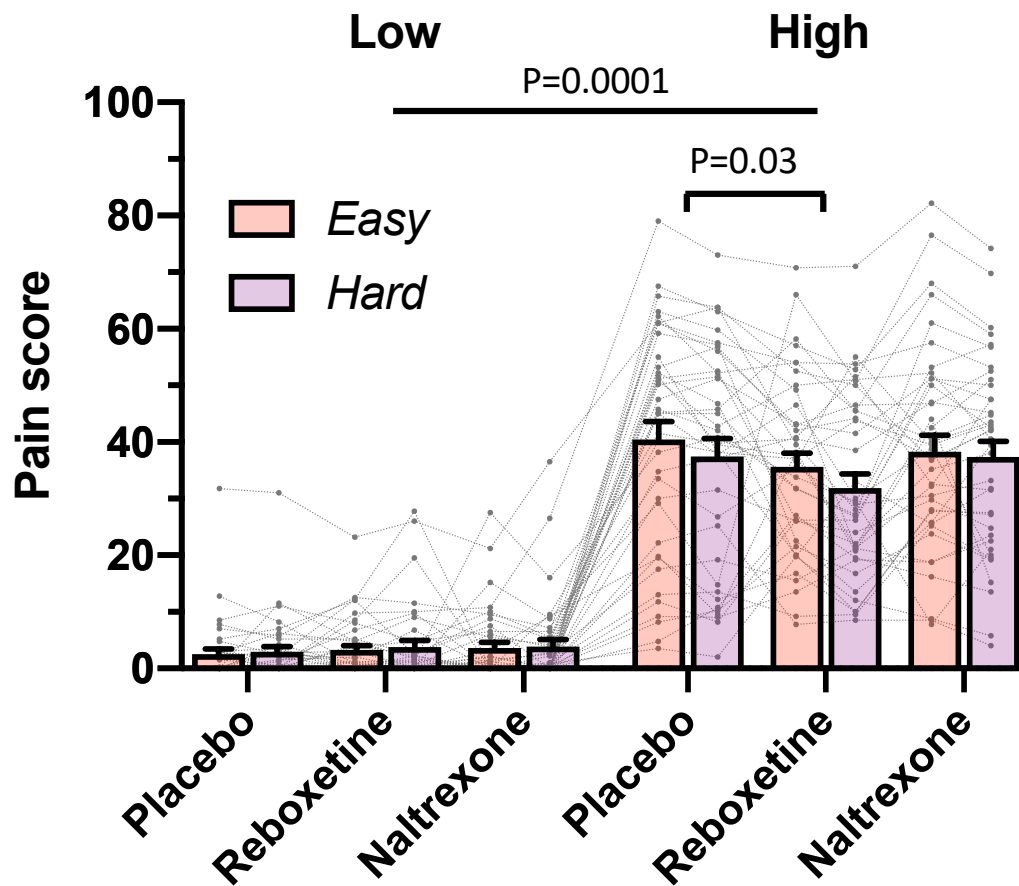

| ANOVA table               | F (DFn, DFd)      | P value  |
|---------------------------|-------------------|----------|
| Drug                      | F (2, 76) = 2.272 | P=0.11   |
| Temperature               | F (1, 38) = 221.6 | P<0.0001 |
| Task                      | F (1, 38) = 4.869 | P=0.034  |
| Drug x Temperature        | F (2, 76) = 3.243 | P=0.045  |
| Drug x Task               | F (2, 76) = 1.210 | P=0.30   |
| Temperature x Task        | F (1, 38) = 10.50 | P=0.0025 |
| Drug x Temperature x Task | F (2, 76) = 1.579 | P=0.21   |
