# Supplementary figures and images for: Simultaneous brain, brainstem, and spinal cord pharmacological-fMRI reveals involvement of an endogenous opioid network in attentional analgesia
Source: eLife journal article supplement (doi:10.7554/elife.71877), 2022-01-26

Figure 2 Supplementary Figure 4

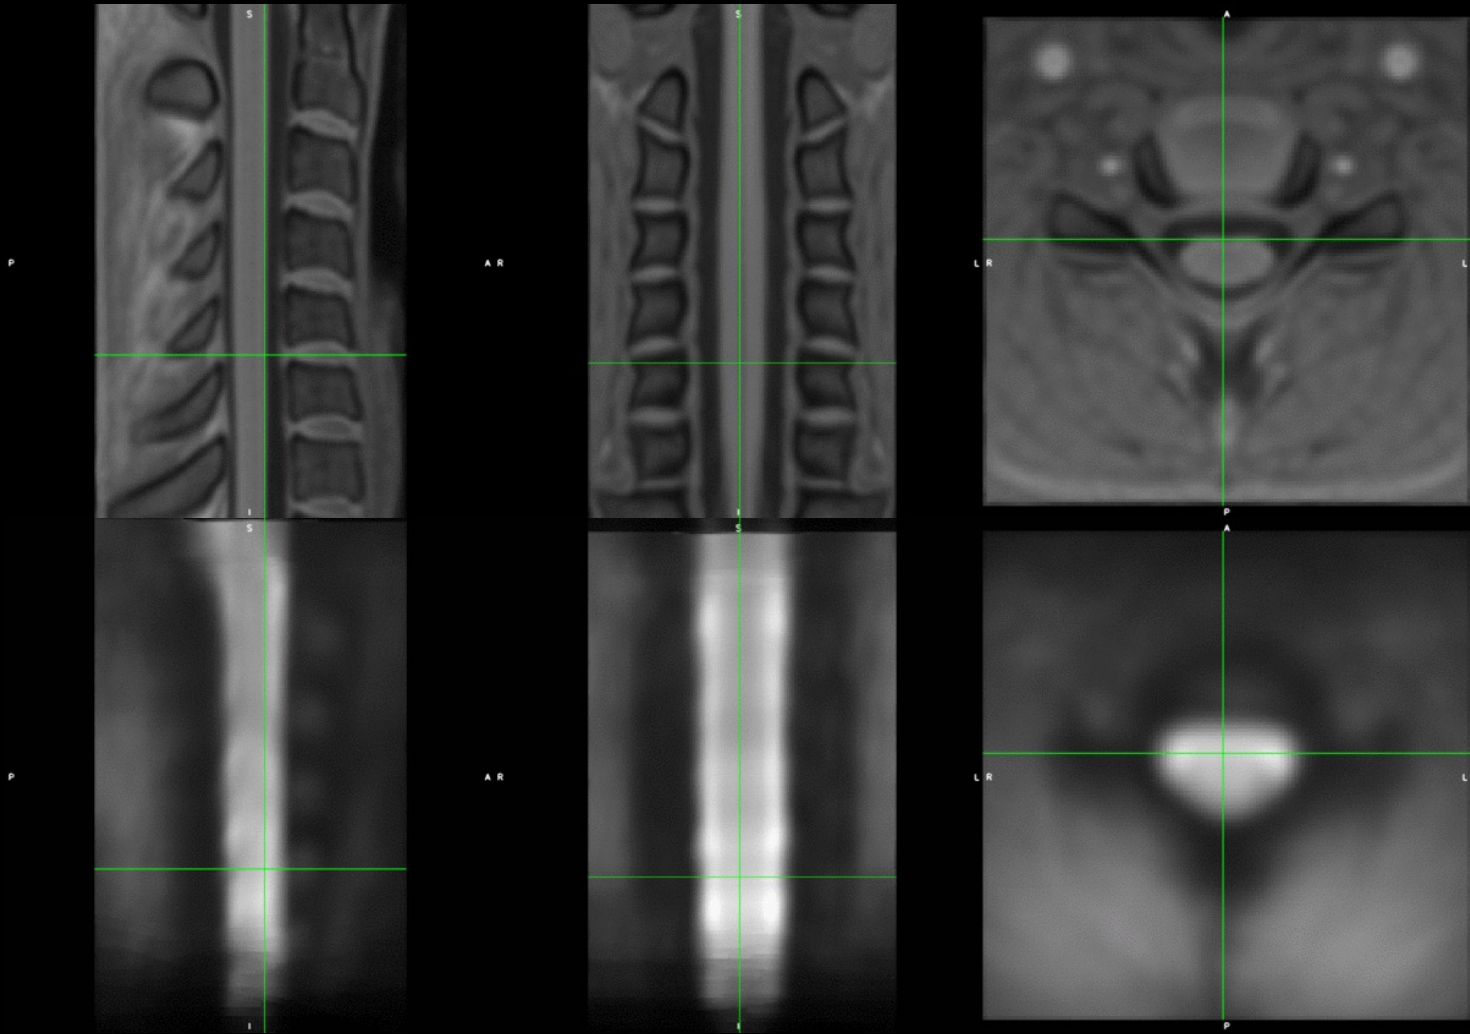

Supplement: supp [file elife-71877-supp-v1.zip]

Figure 2 Supplementary Figure 3

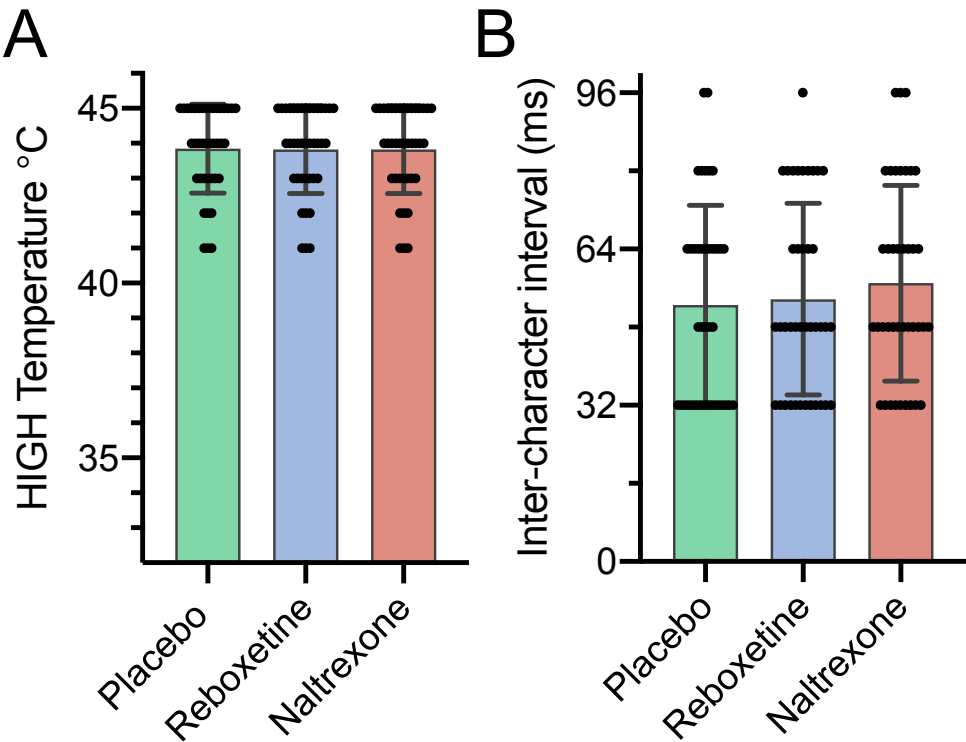

Supplement: supp [file elife-71877-supp-v1.zip]

Figure 2 Supplementary Figure 2

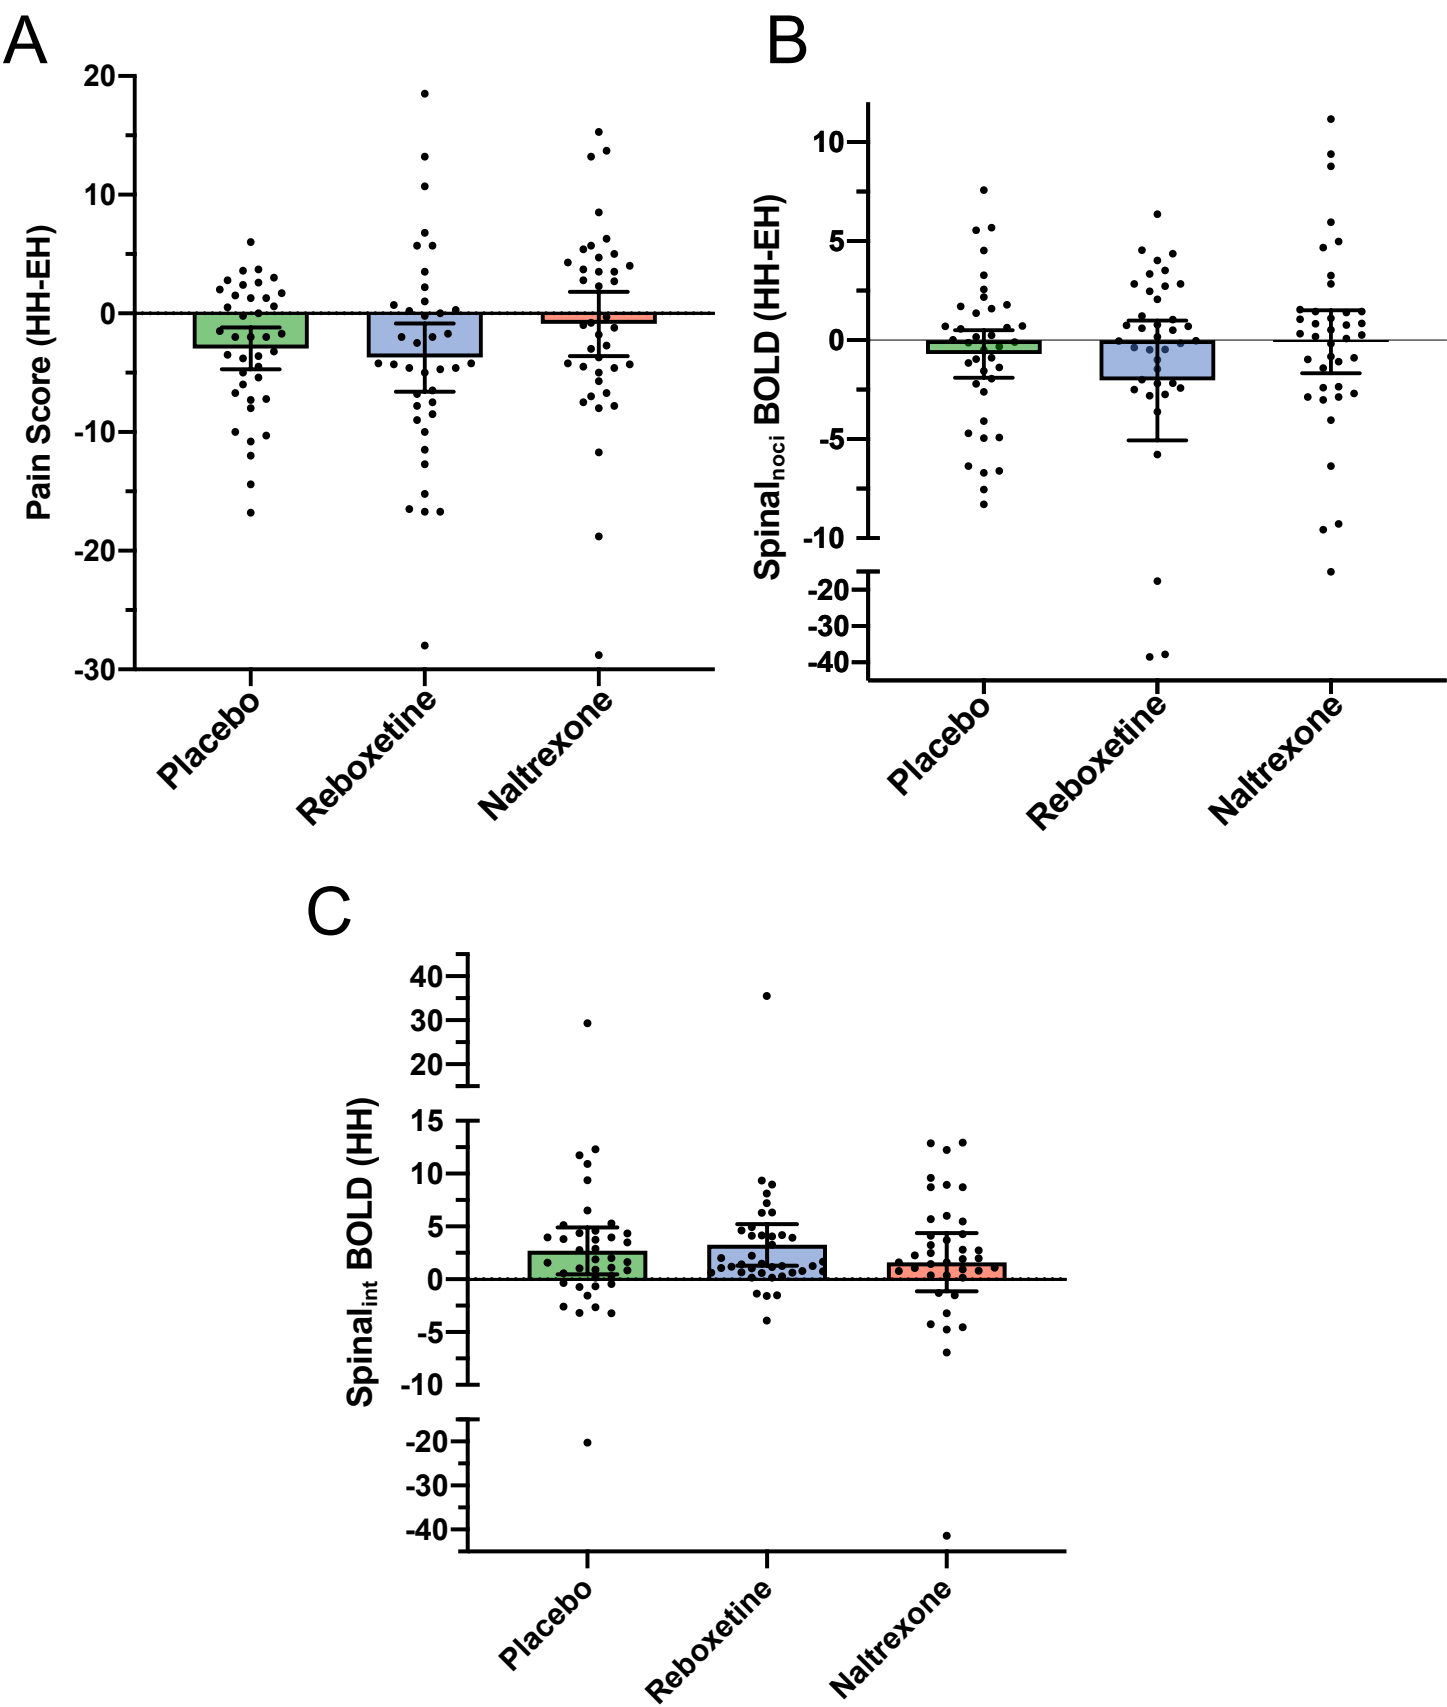

Supplement: supp [file elife-71877-supp-v1.zip]

Figure 3 Supplementary Figure 2

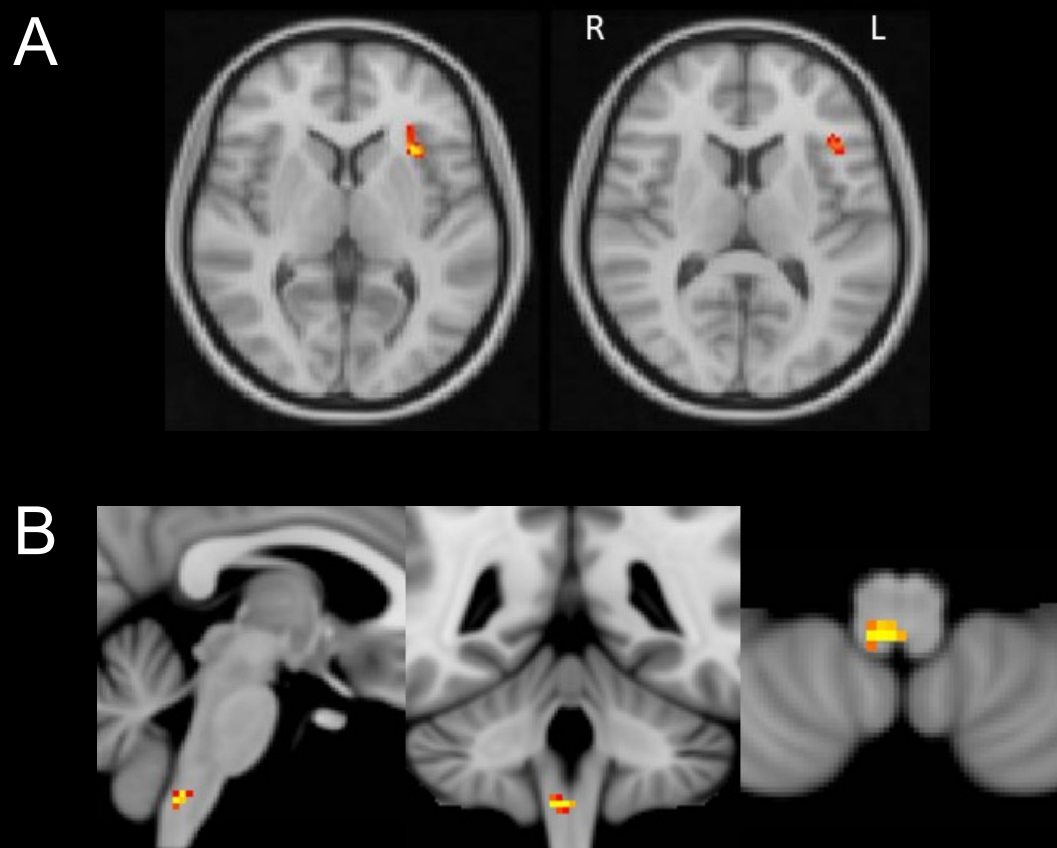

Supplement: supp [file elife-71877-supp-v1.zip]

Figure 4 Supplementary Figure 1

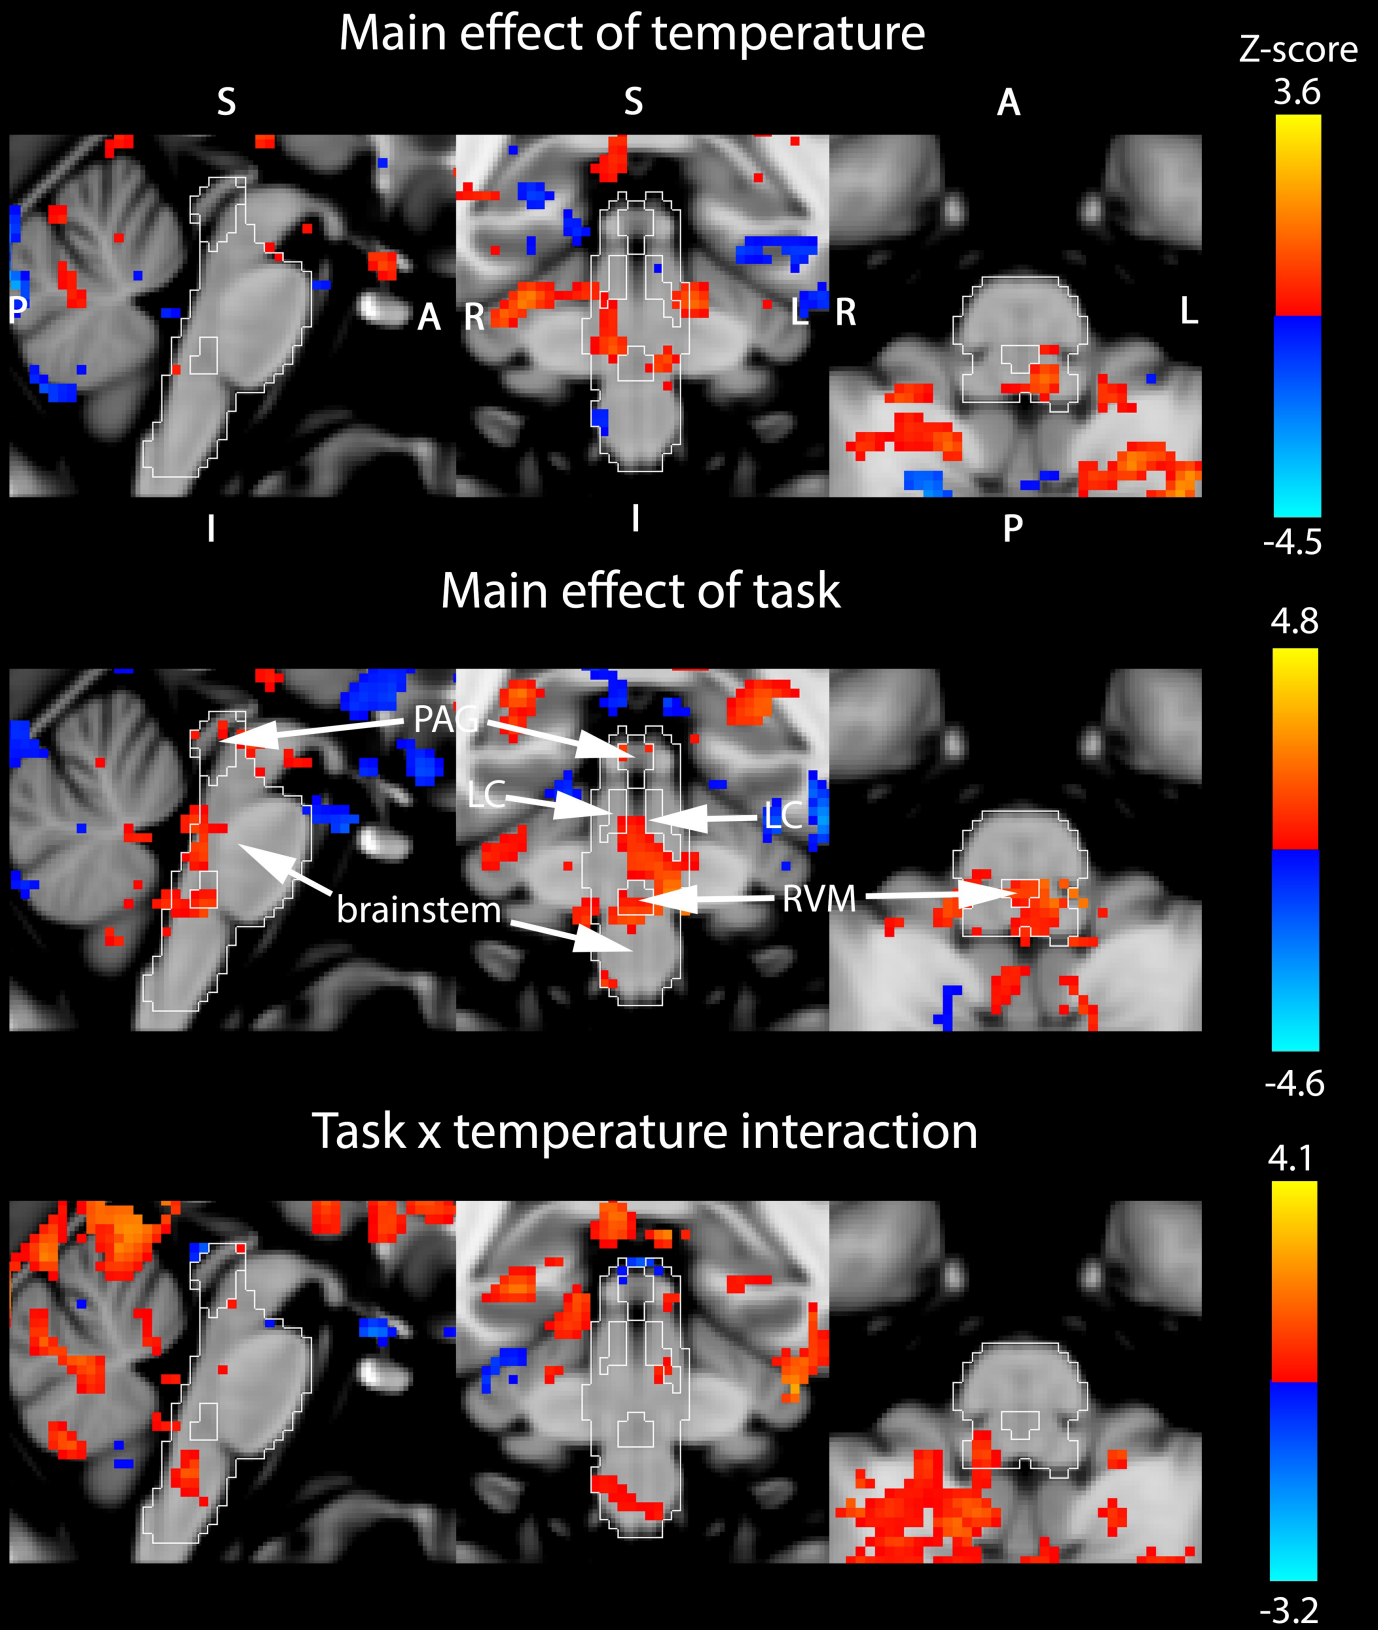

Supplement: supp [file elife-71877-supp-v1.zip]

Figure 1 Supplementary Figure 1

## Temporal signal to noise ratio (tSNR)

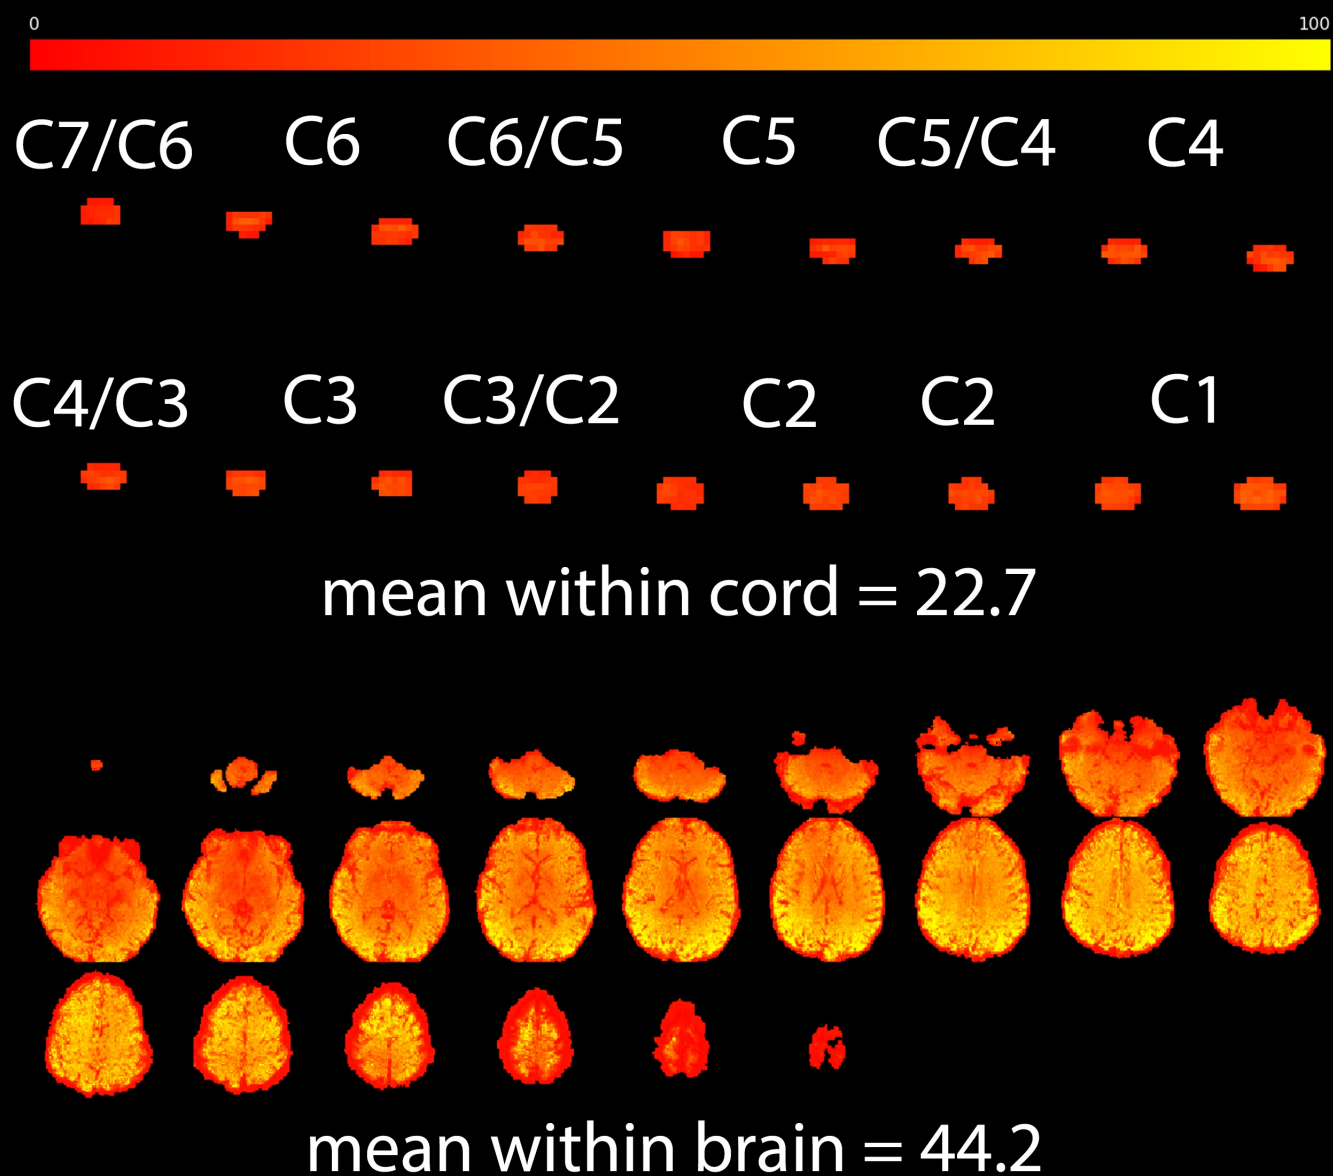

Supplement: supp [file elife-71877-supp-v1.zip]

Figure 3 Supplementary Figure 1

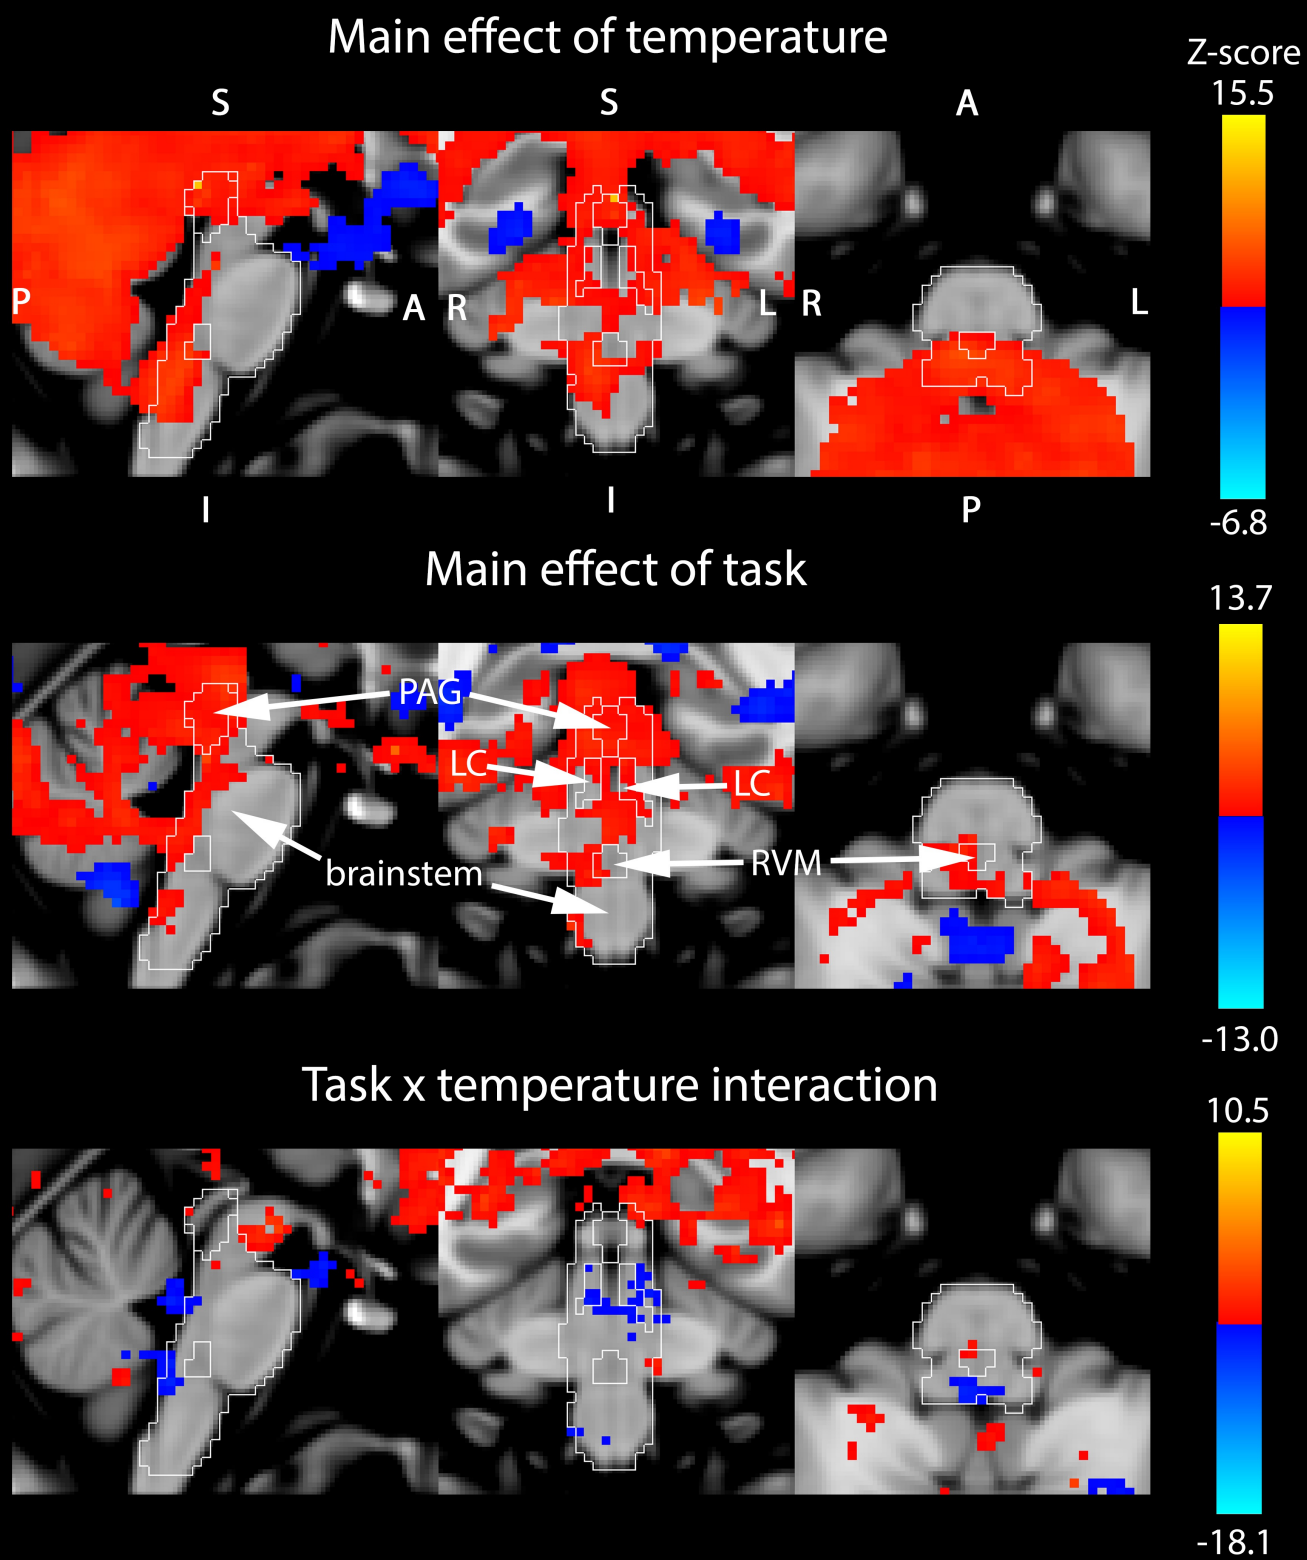

Supplement: supp [file elife-71877-supp-v1.zip]
